# Supplementary material
Source: PubMed Central journal article supplement (PMC4340317)

**Supplementary Table 1. Subject-specific baseline characteristics**

| Sex (F/M) | Age (yrs.) | Genetic diagnosis                                                                       | CVD                    | Lipid-lowering therapy                                  | HDL-c (mg/dl) | ApoA-I (mg/dl) |
|-----------|------------|-----------------------------------------------------------------------------------------|------------------------|---------------------------------------------------------|---------------|----------------|
| M*        | 46         | Homozygosity <i>ApoA-I</i> (Q(-2)X)                                                     | CABG                   | Atorvastatin 80mg, ezetimibe 10mg, nicotinic acid 500mg | 1.80          | 0.22           |
| M*        | 55         | Heterozygosity <i>ABCA1</i> (6401+T2)                                                   | MIs (3)                | Rosuvastatin 15mg                                       | 19.69         | 28.67          |
| M*        | 49         | Heterozygosity <i>ApoA-I</i> (391delAAG exon 4)<br>Heterozygosity <i>ABCA1</i> (C1477R) | MIs (2)<br>PCI (2)     | Rosuvastatin 10mg                                       | 6.21          | 16.49          |
| M         | 51         | Heterozygosity <i>LCAT</i> (T147I)                                                      | -                      | Ezetimibe 10mg/simvastatin 40mg, fish oil capsule       | 29.06         | 59.14          |
| M*        | 68         | Heterozygosity <i>ABCA1</i> (N1800H)                                                    | -<br>Hypertension      | -                                                       | 13.82         | 51.56          |
| F         | 51         | Heterozygosity <i>ApoA-I</i> (L202P)                                                    | -                      | -                                                       | 37.40         | 70.24          |
| F         | 47         | Homozygosity <i>ABCA1</i> (L996P)                                                       | Angina Pectoris<br>PCI | Rosuvastatin 10mg, ezetimibe 10mg                       | 0.60          | 7.90           |

This table represents individual subject characteristics at baseline, including genetic mutations. \*Subject participated in fecal sterol excretion experiment

Abbreviations: ApoA-I = apolipoprotein A-I; ABCA1 = ATP-binding cassette transporter A1; CABG = coronary artery bypass graft; CVD = cardiovascular disease; HDL-c = HDL-cholesterol; LCAT = lecithin:cholesterol acyl transferase; MI = myocardial infarction; PCI = percutaneous coronary intervention

## **Supplementary figure legends**

### **Supplementary figure 1.** *Lipoprotein profile changes and apoA-I kinetics after six months of treatment*

Plasma was obtained at baseline and 1, 4, 8 and 24 hours after start of the 20<sup>th</sup> infusion. Row A depicts changes in plasma cholesterol levels, row B in HDL-cholesterol, row C in LDL-cholesterol, row D in VLDL-cholesterol and row E in apoA-I. Data represent baseline-corrected medians with interquartile ranges. Values at every time point were compared to baseline. A p-value < 0.05 was considered statistically significant and is depicted with an asterisk.

Abbreviation: apoA-I = apolipoprotein A-I; IQR = interquartile range

### **Supplementary figure 2.** *Fecal sterol excretion*

Shown is the fecal sterol excretion (specified into neutral sterols and bile acids) within 8 days prior to and after the first infusion of CER-001 in a subpopulation of four subjects. Subject 1 was homozygous for an ApoA-1 mutation; subject 2 heterozygous for an ABCA1 mutation; subject 3 heterozygous for an ApoA-I and ABCA1 mutation; and subject 4 heterozygous for an ABCA1 mutation.

# Supplementary Figure 1. Lipoprotein profile changes and apoA-I kinetics after six months of treatment

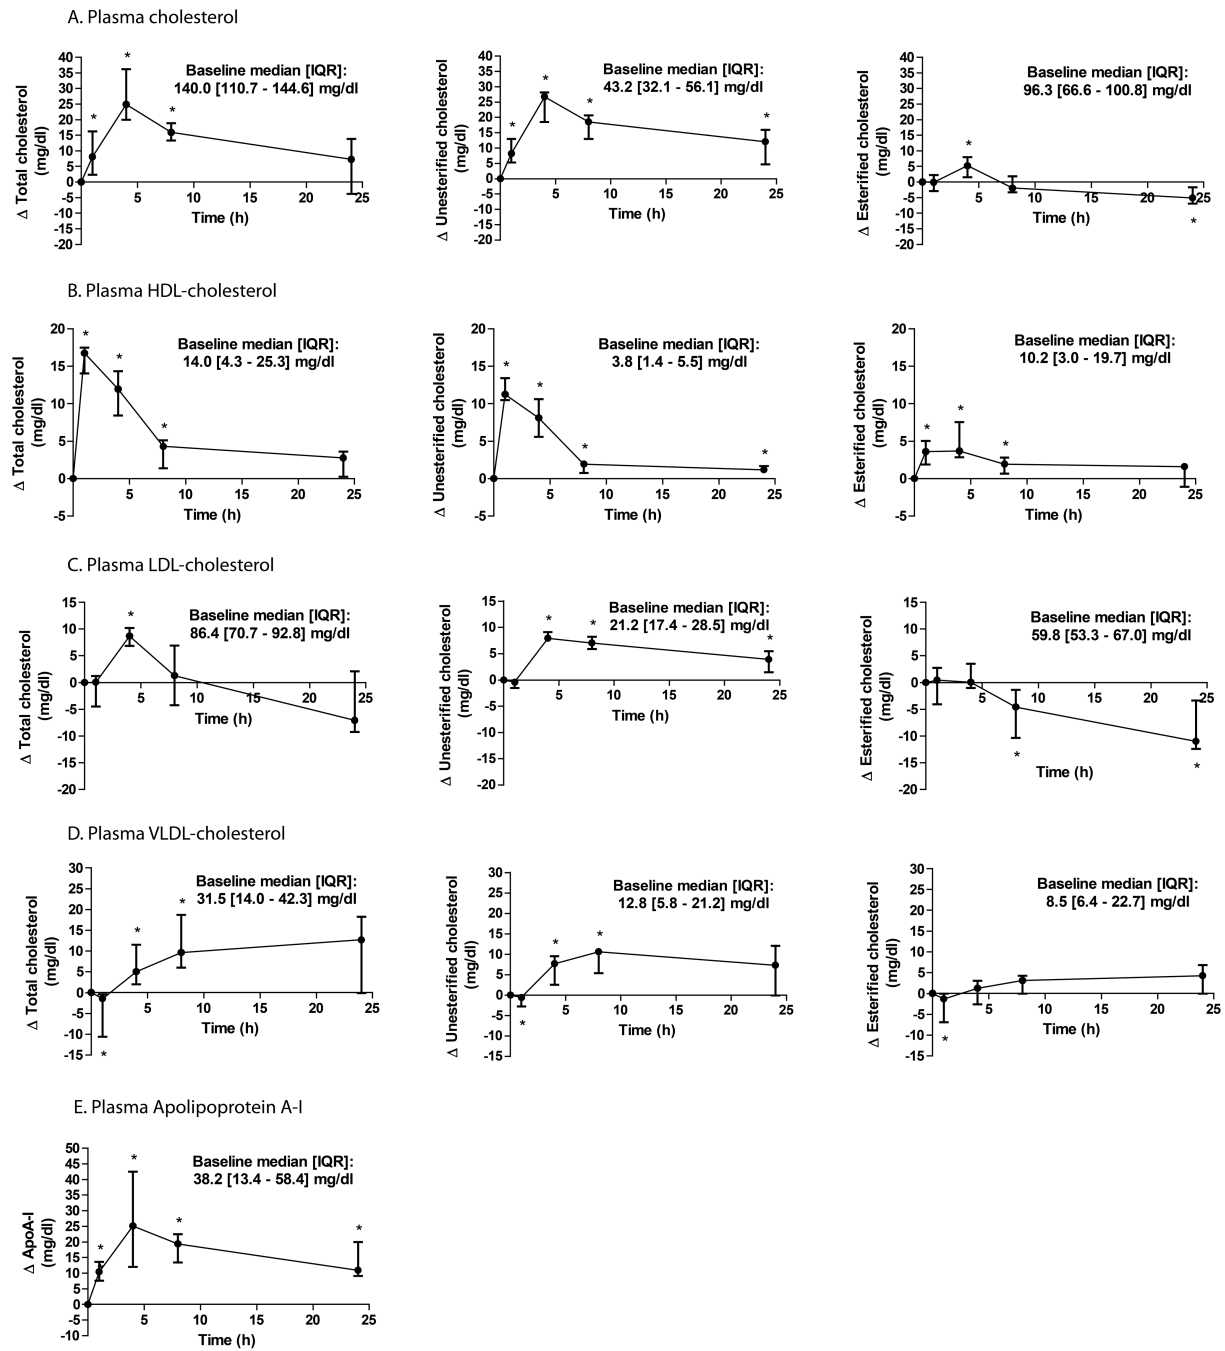

Supplementary figure 2.

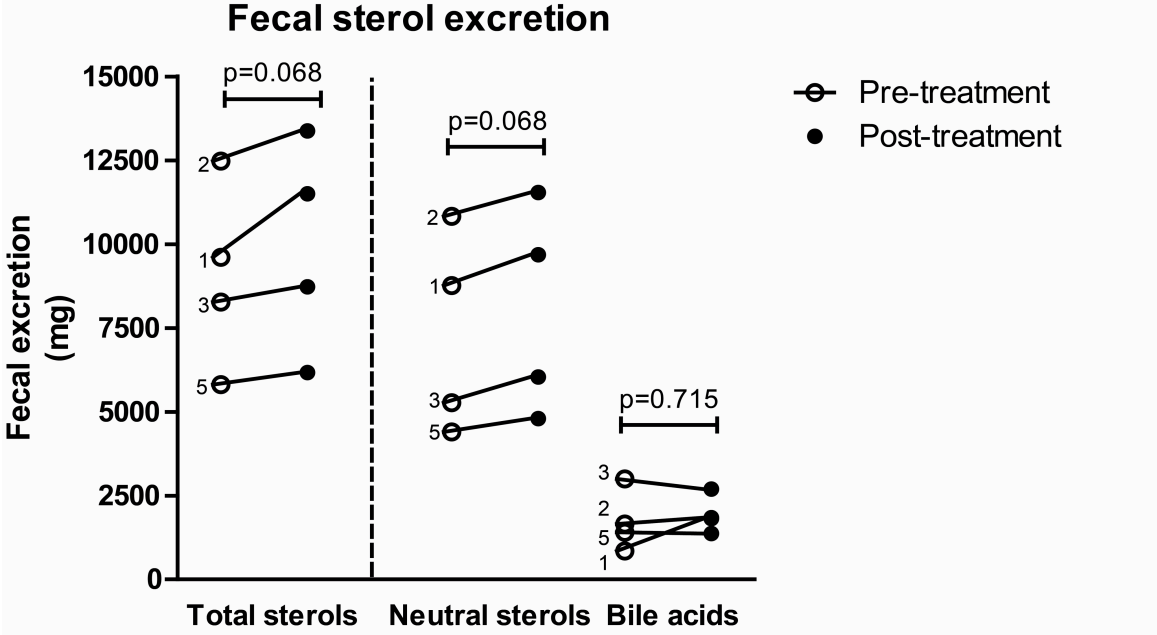

Supplement: supp_M055665_jlr.M055665-1.pdf [file supp_M055665_jlr.M055665-1.pdf]
